# Supplementary material for: La práctica francesa del pacto de tontina entre coadquirentes: utilidad y posibilidad
Source: Royal Society of Chemistry journal article supplement (doi:10.1039/c9cp03000j), 2004-01-01
Supplement: c9cp03000j1.pdf [file c9cp03000j1.pdf]

Supporting information for:

# Solvation dynamics: Improved reproduction of the time-dependent Stokes shift with polarizable empirical force field chromophore models

Esther Heid, Stella Schmode, Christian Schröder

*University of Vienna, Faculty of Chemistry, Department of Computational Biological Chemistry, Währingerstraße 17, A-1090 Vienna, Austria*

Payal Chatterjee, Alexander D. MacKerell Jr.

*Department of Pharmaceutical Sciences, School of Pharmacy, University of Maryland, Baltimore, Maryland 21201, USA*

christian.schroeder@univie.ac.at

## 1 Solvent structure

Radial distribution functions around the whole solute, as well as the center of masses of the oxygen and nitrogen containing sites (colored in red and green in Fig. S1, respectively) were calculated for MQ and C153 in the ground and excited state. Fig. S2 depicts the radial distribution functions in water. Upon excitation, mainly the distribution around the oxygen site, which loses both electron densities and hydrogen bonds, changes. The polarizable and nonpolarizable force field produce nearly identical structures.

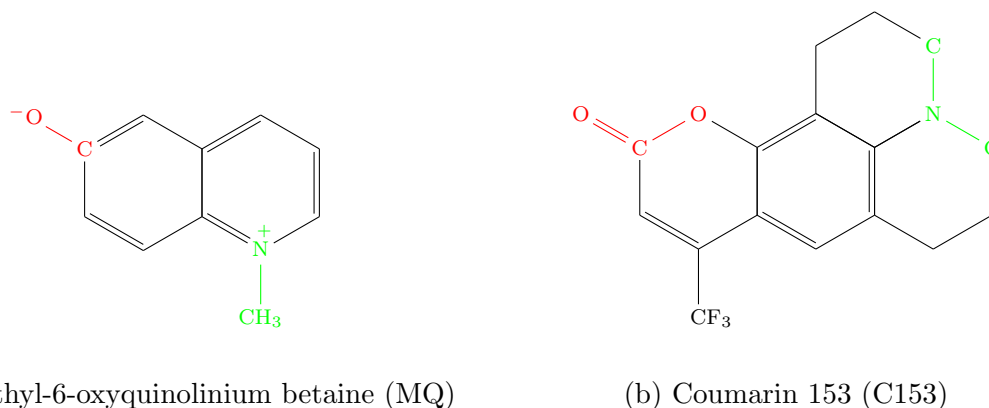

Figure S1: Oxygen sites (red) and nitrogen sites (green) of MQ and C153 used in the analysis of radial distribution functions.

Fig. S3 depicts the radial distribution functions in methanol. The changes in solvent structure upon excitation are stronger for MQ than for C153. Again, mainly the structure around the oxygen site of MQ differs between the ground and excited state. The inclusion of polarizability to the force field does not change the solvent structure.

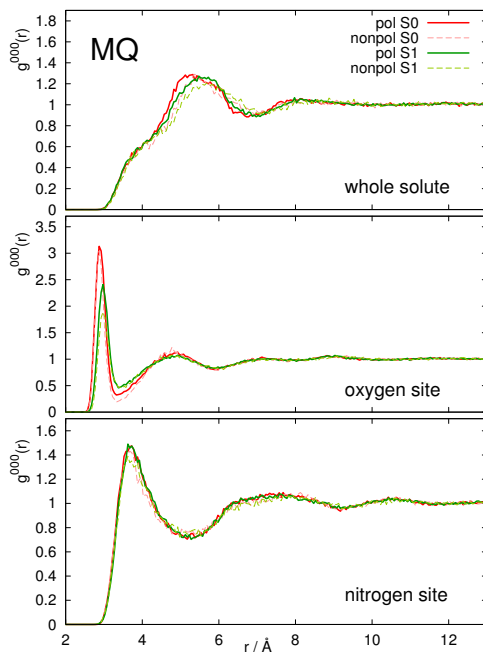

Figure S2: Radial distribution functions around the chromophore MQ (top) as well as around the oxygen (middle) and nitrogen containing sites (bottom) in water.

Fig. S4 depicts the radial distribution functions in EmimOTf. Since no hydrogen bonds occur between both chromophores and the solvent, no specific interactions or large changes were found for the oxygen site in MQ upon excitation. The solvent structure undergoes considerable changes upon inclusion of polarizability to the solvent models, especially at the oxygen sites of the two chromophores.

## 2 Mass of Drude particles

The masses of the Drude particles were set to 0.2 amu to be consistent with the Drude masses in the employed ionic liquid force field. To ensure that the choice of the mass does not affect any of our results we conducted additional simulations with a Drude mass of 0.4 amu for MQ in water and methanol, as well as C153 in methanol. The obtained dipole moment distributions, radial distribution functions and absolute time-dependent Stokes shifts are depicted in Fig. S5. The results from simulations with masses of 0.2 amu and 0.4 amu coincide apart from numerical errors.

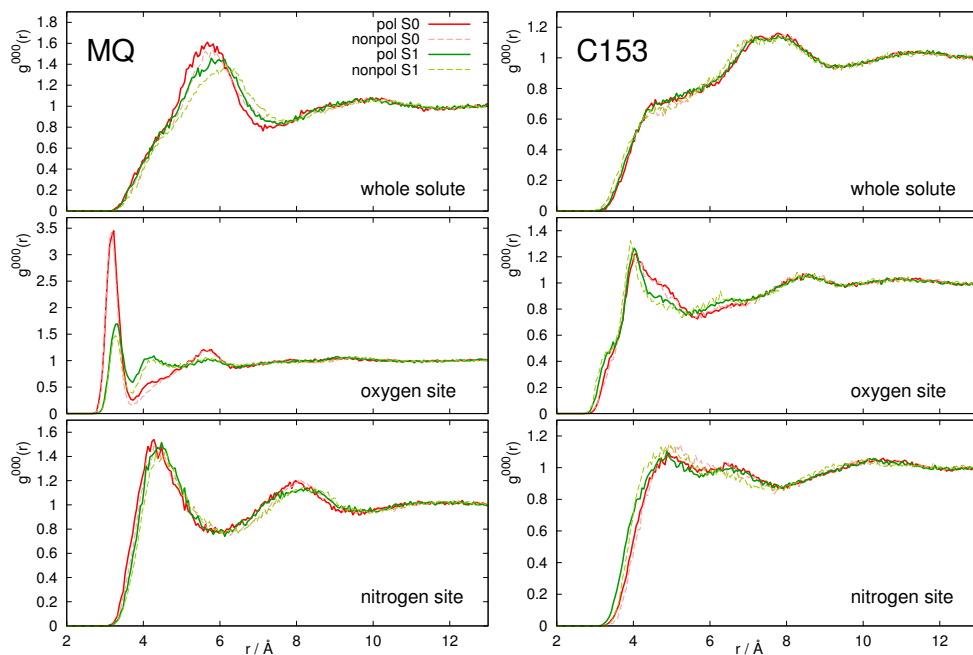

Figure S3: Radial distribution functions around the chromophores MQ and C153 (top) as well as around the oxygen (middle) and nitrogen containing sites (bottom) in methanol.

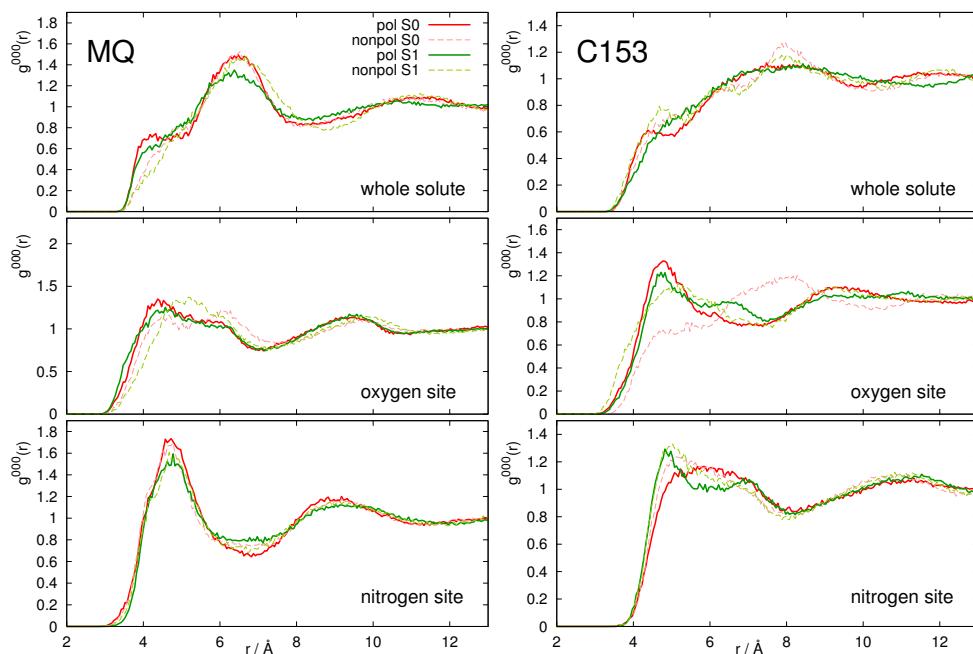

Figure S4: Radial distribution functions around the chromophores MQ and C153 (top) as well as around the oxygen (middle) and nitrogen containing sites (bottom) in EmimOTf.

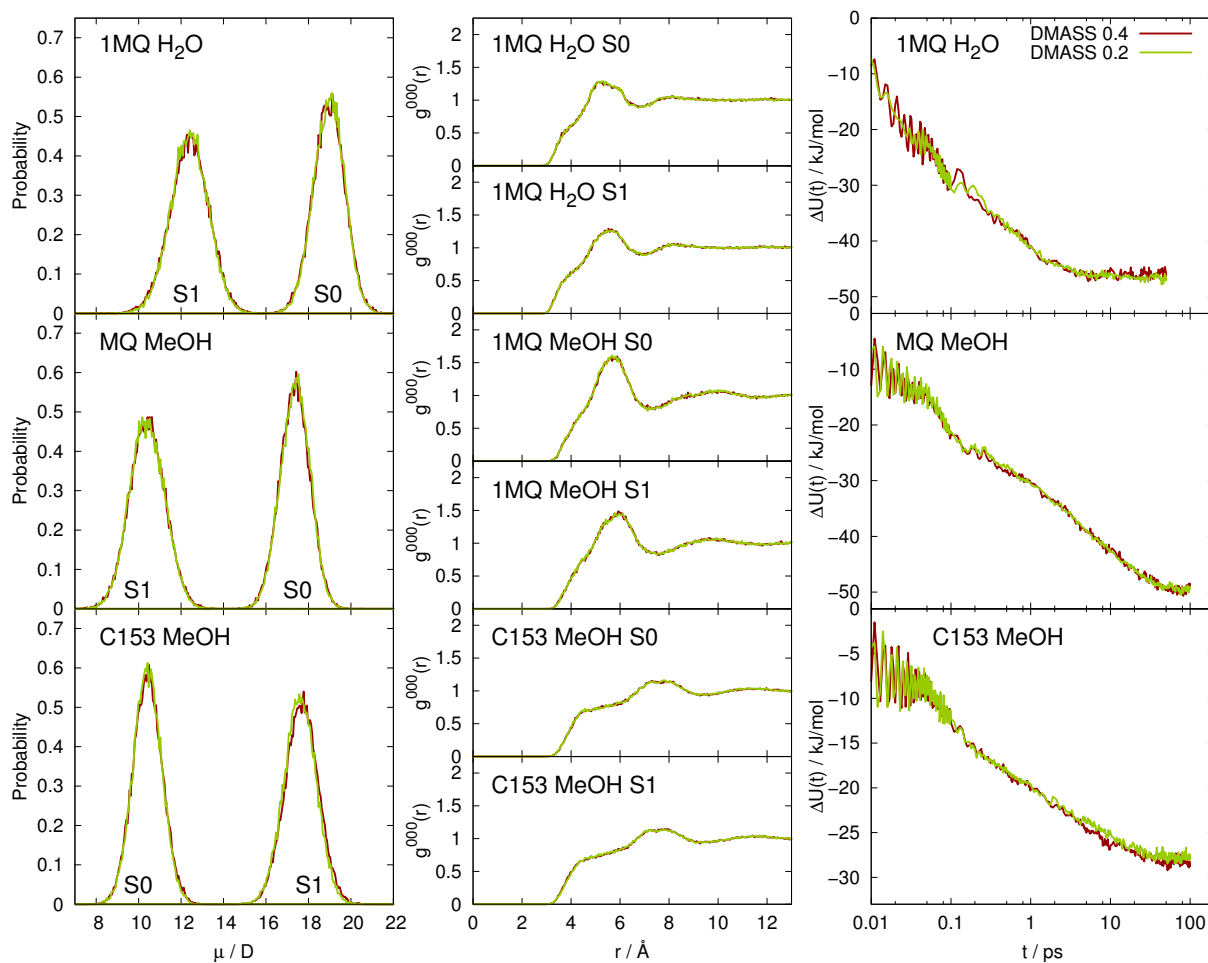

Figure S5: Dipole moments (left), radial distribution functions (middle) and time-dependent Stokes shift (right) of MQ in water (top), MQ in methanol (middle) and C153 in methanol (bottom).

### 3 TDSS fit parameters

Table S1 lists the fit parameters of the fit function

$$f(t) = a_0 + \sum_{i=1}^3 a_i \cdot e^{-\frac{t}{\tau_i}} \quad (1)$$

as well as the magnitude of the overall shift in electrostatic energy  $\Delta U$ .

Table S1: Fit parameters of the TDSS obtained from simulations with nonpolarizable solvent and chromophore (np/np), polarizable solvent and nonpolarizable chromophore (p/np) and polarizable solvent and chromophore force fields (p/p)

|      |                  |       | $a_0$<br>[ $\frac{\text{kJ}}{\text{mol}}$ ] | $a_1$<br>[ $\frac{\text{kJ}}{\text{mol}}$ ] | $a_2$<br>[ $\frac{\text{kJ}}{\text{mol}}$ ] | $a_3$<br>[ $\frac{\text{kJ}}{\text{mol}}$ ] | $\tau_1$<br>[ps] | $\tau_2$<br>[ps] | $\tau_3$<br>[ps] | $\Delta U$<br>[ $\frac{\text{kJ}}{\text{mol}}$ ] |      |
|------|------------------|-------|---------------------------------------------|---------------------------------------------|---------------------------------------------|---------------------------------------------|------------------|------------------|------------------|--------------------------------------------------|------|
| MQ   | H <sub>2</sub> O | p/np  | 58.5                                        | 27.7                                        | 8.7                                         | 7.3                                         | 0.023            | 0.263            | 1.32             | 43.7                                             |      |
|      |                  | p/p   | 84.2                                        | 21.3                                        | 13.4                                        | 7.8                                         | 0.026            | 0.361            | 1.75             | 42.5                                             |      |
|      | MeOH             | p/np  | 53.1                                        | 20.3                                        | 9.8                                         | 11.5                                        | 0.069            | 0.986            | 9.84             | 41.5                                             |      |
|      |                  | p/p   | 53.0                                        | 16.6                                        | 7.4                                         | 16.6                                        | 0.072            | 0.879            | 7.78             | 40.5                                             |      |
|      | EmimOTf          | p/np  | 41.5                                        | 19.8                                        | 6.7                                         | 7.9                                         | 0.077            | 10.4             | 658              | 34.4                                             |      |
|      |                  | p/p   | 36.0                                        | 13.7                                        | 6.3                                         | 8.1                                         | 0.175            | 25.0             | 807              | 28.1                                             |      |
| C153 | MeOH             | p/np  | -67.0                                       | 14.1                                        | 6.6                                         | 5.4                                         | 0.110            | 1.17             | 13.0             | 26.1                                             |      |
|      |                  | p/p   | -52.7                                       | 11.1                                        | 5.3                                         | 6.0                                         | 0.117            | 1.29             | 11.              | 22.4                                             |      |
|      | EmimOTf          | np/np | -64.0                                       | 17.5                                        | 6.1                                         | 8.5                                         | 0.245            | 21.7             | 863              | 32.0                                             |      |
|      |                  | p/np  | -64.0                                       | 15.9                                        | 5.3                                         | 8.2                                         | 0.095            | 10.9             | 886              | 29.4                                             |      |
|      |                  | p/p   |                                             | -49.5                                       | 13.3                                        | 5.3                                         | 7.1              | 0.083            | 9.18             | 986                                              | 25.8 |

## 4 Force field

Force field model of MQ. The masses of the Drude particles were set to 0.2 amu.

```
* DRUDE model compound topology file
*
READ RTF CARD
=====
*.  T O P O L O G Y   O F   Q U I N O L O N E
=====
*
99
MASS   1 ND2R6C   14.00700
MASS   2 CD33A   12.01100
MASS   3 CD2R6B   12.01100
MASS   4 CD2R6A   12.01100
MASS   5 CD2R6I   12.01100
MASS   6 HDA3A    1.00800
MASS   7 HDR6B    1.00800
MASS   8 HDR6A    1.00800
MASS   9 OD30E   15.99900
MASS  199 DRUD    0.00000

AUTO DRUDE ANGL DIHE

RESI MQSO          0.000 !
GROUP
!
!           H2       H3
!           \       /
!      HN1   C2--C3
!           //      \\
!   HN2--CN--N1(+)  C4--H4
!           /       \
!      HN3   C8A==C4A
!           /       \
!      H8--C8   C5--H5
!           \\      //
!           C7--C6
!           /       \
!           H7       O6(-)
!
!charges: wB97xD/aug-cc-pVTZ CHelpG PCM scaled 0.88
!polarizability: MP2/Sadlej gas phase scaled 0.724
ATOM CN      CD33A   -0.0904      ALPHA  -1.302  THOLE  1.300
ATOM HN1     HDA3A    0.0876
ATOM HN2     HDA3A    0.0876
ATOM HN3     HDA3A    0.0876
ATOM N1      ND2R6C   0.0242      ALPHA  -1.218  THOLE  1.000
ATOM C2      CD2R6B   0.0203      ALPHA  -1.376  THOLE  1.100
ATOM H2      HDR6B    0.1296
ATOM C3      CD2R6A  -0.1573      ALPHA  -1.371  THOLE  1.300
ATOM H3      HDR6A    0.1330
ATOM C4      CD2R6A  -0.0759      ALPHA  -1.452  THOLE  1.300
ATOM H4      HDR6A    0.1261
ATOM C4A     CD2R6A   0.1667      ALPHA  -1.363  THOLE  1.300
ATOM C5      CD2R6A  -0.5181      ALPHA  -1.613  THOLE  1.300
ATOM H5      HDR6A    0.1536
ATOM C6      CD2R6I   0.6293      ALPHA  -1.271  THOLE  1.000
ATOM O6      OD30E   -0.7379      ALPHA  -1.173  THOLE  1.000
ATOM C7      CD2R6A  -0.2482      ALPHA  -1.363  THOLE  1.300
ATOM H7      HDR6A    0.1184
ATOM C8      CD2R6A  -0.1736      ALPHA  -1.432  THOLE  1.300
ATOM H8      HDR6A    0.1523
ATOM C8A     CD2R6B   0.0851      ALPHA  -1.333  THOLE  1.100
BOND C4      C4A
BOND C4      C3
BOND C4      H4
BOND C4A     C5
BOND C8A     N1
```

```

BOND C8A C8
BOND N1 CN
BOND C2 C3
BOND C2 H2
BOND C3 H3
BOND C8 H8
BOND C7 C6
BOND C7 H7
BOND C6 O6
BOND C5 H5
BOND CN HN1
BOND CN HN2
BOND CN HN3
BOND N1 C2
BOND C8 C7
BOND C6 C5
BOND C4A C8A

```

```

RESI MQS1          0.000 !
GROUP

```

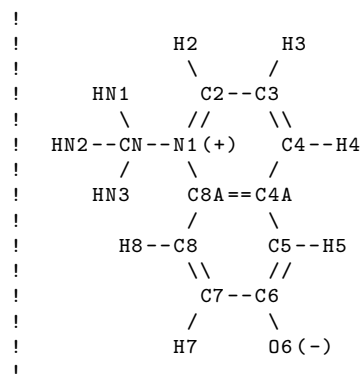

!charges: wB97xD/aug-cc-pVTZ CHelpG PCM scaled 0.88

!polarizability: MP2/Sadlej gas phase scaled 0.724

|          |        |         |       |        |       |       |
|----------|--------|---------|-------|--------|-------|-------|
| ATOM CN  | CD33A  | -0.1575 | ALPHA | -1.440 | THOLE | 1.300 |
| ATOM HN1 | HDA3A  | 0.0881  |       |        |       |       |
| ATOM HN2 | HDA3A  | 0.0881  |       |        |       |       |
| ATOM HN3 | HDA3A  | 0.0881  |       |        |       |       |
| ATOM N1  | ND2R6C | 0.1221  | ALPHA | -1.364 | THOLE | 1.000 |
| ATOM C2  | CD2R6B | -0.1629 | ALPHA | -1.632 | THOLE | 1.100 |
| ATOM H2  | HDR6B  | 0.1390  |       |        |       |       |
| ATOM C3  | CD2R6A | -0.1057 | ALPHA | -1.529 | THOLE | 1.300 |
| ATOM H3  | HDR6A  | 0.1114  |       |        |       |       |
| ATOM C4  | CD2R6A | -0.2116 | ALPHA | -1.714 | THOLE | 1.300 |
| ATOM H4  | HDR6A  | 0.1124  |       |        |       |       |
| ATOM C4A | CD2R6A | 0.1646  | ALPHA | -1.622 | THOLE | 1.300 |
| ATOM C5  | CD2R6A | -0.2937 | ALPHA | -1.574 | THOLE | 1.300 |
| ATOM H5  | HDR6A  | 0.1341  |       |        |       |       |
| ATOM C6  | CD2R6I | 0.6142  | ALPHA | -1.271 | THOLE | 1.100 |
| ATOM O6  | OD30E  | -0.5817 | ALPHA | -1.032 | THOLE | 1.100 |
| ATOM C7  | CD2R6A | -0.3208 | ALPHA | -1.688 | THOLE | 1.300 |
| ATOM H7  | HDR6A  | 0.1181  |       |        |       |       |
| ATOM C8  | CD2R6A | -0.1796 | ALPHA | -1.565 | THOLE | 1.300 |
| ATOM H8  | HDR6A  | 0.1674  |       |        |       |       |
| ATOM C8A | CD2R6B | 0.0659  | ALPHA | -1.493 | THOLE | 1.100 |

```

BOND C4 C4A
BOND C4 C3
BOND C4 H4
BOND C4A C5
BOND C8A N1
BOND C8A C8
BOND N1 CN
BOND C2 C3
BOND C2 H2
BOND C3 H3
BOND C8 H8
BOND C7 C6
BOND C7 H7

```

```

BOND C6 O6
BOND C5 H5
BOND CN HN1
BOND CN HN2
BOND CN HN3
BOND N1 C2
BOND C8 C7
BOND C6 C5
BOND C4A C8A

```

END

READ PARA CARD

```

=====
* . P A R A M E T E R   O F   Q U I N O L O N E
=====
*

```

ATOMS

```

!-----
!      ID  NAME      MASS
!-----
MASS   1  ND2R6C    14.00700
MASS   2  CD33A     12.01100
MASS   3  CD2R6B    12.01100
MASS   4  CD2R6A    12.01100
MASS   5  CD2R6I    12.01100
MASS   6  HDA3A     1.00800
MASS   7  HDR6B     1.00800
MASS   8  HDR6A     1.00800
MASS   9  OD30E    15.99900
MASS  199  DRUD      0.00000

```

BONDS

```

!
! U_bond = k ( r - r0 )^2
!
!-----
! TYPE1      TYPE2      k [kcal/mol Angstroem^2]      r0 [Angstroem]
!-----
ND2R6C      CD2R6B      407.80      1.334
CD33A       HDA3A       322.00      1.111
ND2R6C      CD33A       400.00      1.456
CD2R6A      CD2R6B      361.10      1.378
CD2R6A      CD2R6A      305.00      1.375
CD2R6A      HDR6A       340.00      1.080
CD2R6B      HDR6B       340.00      1.080
OD30E       CD2R6I      334.30      1.262
CD2R6I      CD2R6A      305.00      1.384
X           DRUD       500.0       0.000

```

ANGLES

```

!
! U_angle = k ( theta - theta0 )^2
!
!-----
! TYPE1      TYPE2      TYPE3      k [kcal/mol rad^2]      theta0 [deg]
!-----
ND2R6C      CD33A      HDA3A      33.43      104.00
HDA3A      CD33A      HDA3A      35.50      108.40      5.40      1.802
CD2R6A      CD2R6B      HDR6B      43.40      120.00      18.60      2.1525
CD2R6B      CD2R6A      HDR6A      26.00      120.00      21.00      2.1525
CD2R6A      CD2R6A      HDR6A      30.00      120.00      22.00      2.1525
CD2R6A      CD2R6A      CD2R6B      46.10      120.00      29.80      2.4480
CD2R6A      CD2R6A      CD2R6A      40.00      120.00      35.00      2.4162
CD2R6A      CD2R6A      CD2R6I      50.00      118.20
CD2R6I      CD2R6A      HDR6A      30.00      116.55
CD2R6A      CD2R6I      OD30E      55.20      127.80
CD2R6A      CD2R6I      CD2R6A      50.00      111.50
CD2R6B      ND2R6C      CD2R6B      19.60      100.00      54.20      2.2850

```



|        |        |        |       |        |       |        |
|--------|--------|--------|-------|--------|-------|--------|
| ND2R6C | CD2R6B | CD2R6A | 25.40 | 119.20 |       |        |
| ND2R6C | CD2R6B | HDR6B  | 25.90 | 112.00 | 32.20 | 2.0500 |
| CD2R6B | ND2R6C | CD33A  | 40.00 | 118.40 |       |        |
| CD2R6A | CD2R6B | CD2R6A | 40.00 | 120.00 | 35.00 | 2.4162 |

DIHEDRALS

!  
! U\_dihedral = k ( 1 + Cos[n phi - delta] )  
!

```

!-----
! TYPE1      TYPE2      TYPE3      TYPE4      k [kcal/mol]      n      delta [deg]
!-----
CD2R6B      CD2R6A      CD2R6A      HDR6A      3.600      2      180.00
CD2R6A      CD2R6A      CD2R6A      CD2R6B      5.350      2      180.00
HDR6A      CD2R6A      CD2R6B      HDR6B      2.400      2      180.00
CD2R6A      CD2R6A      CD2R6B      HDR6B      5.400      2      180.00
CD2R6A      CD2R6A      CD2R6A      CD2R6A      2.800      2      180.00
HDR6A      CD2R6A      CD2R6A      HDR6A      2.400      2      180.00
CD2R6A      CD2R6A      CD2R6A      HDR6A      4.200      2      180.00
CD2R6A      CD2R6A      CD2R6A      CD2R6I      2.800      2      180.00
CD2R6A      CD2R6A      CD2R6I      CD2R6A      2.800      2      180.00
CD2R6A      CD2R6I      CD2R6A      HDR6A      4.200      2      180.00
OD30E      CD2R6I      CD2R6A      CD2R6A      3.100      2      180.00
OD30E      CD2R6I      CD2R6A      HDR6A      4.200      2      180.00
CD2R6I      CD2R6A      CD2R6A      HDR6A      4.200      2      180.00
CD2R6A      CD2R6A      CD2R6B      CD2R6A      4.400      2      180.00
CD2R6B      ND2R6C      CD2R6B      CD2R6A      8.000      2      180.00
CD2R6B      ND2R6C      CD2R6B      HDR6B      0.138      2      0.00
CD2R6A      CD2R6A      CD2R6B      ND2R6C      10.147      2      180.00
HDR6A      CD2R6A      CD2R6B      ND2R6C      1.103      2      180.00
HDR6B      CD2R6B      ND2R6C      CD33A      0.300      2      180.00
CD2R6A      CD2R6B      ND2R6C      CD33A      3.5000      2      180.00
HDA3A      CD33A      ND2R6C      CD2R6B      0.0934      3      0.00
CD2R6A      CD2R6B      CD2R6A      HDR6A      0.5272      2      180.00
CD2R6B      CD2R6A      CD2R6A      CD2R6I      7.3361      2      0.00

```

NONBONDED nbxmod 5 atom vatom cdiel vdistance switch vswitch -  
cutnb 16.0 ctofnb 12.0 ctonnb 10.0 eps 1.0 e14fac 1.0 wmin 1.5

```

!-----
! TYPE1      epsilon      rmin/2      epsilon14      rmin14/2
!      [kcal/mol] [Angstroem]      [kcal/mol] [Angstroem]
!-----
ND2R6C      0.0      -0.1180      1.8440
CD33A      0.0      -0.0780      2.0400      0.0 -0.01 1.9
CD2R6B      0.0      -0.1190      1.8700
CD2R6A      0.0      -0.0690      2.0900
CD2R6I      0.0      -0.7800      1.5500
OD30E      0.0      -0.8300      1.5200
HDA3A      0.0      -0.0240      1.3400
HDR6B      0.0      -0.0700      0.8000
HDR6A      0.0      -0.0300      1.0500
DRUD      0.00      -0.0000      0.0000

```

END  
RETURN

Force field model of C153. The masses of the Drude particles were set to 0.2 amu.

\* DRUDE model compound topology file

\*

READ RTF CARD

\*\*\*\*\*

\*. T O P O L O G Y O F C O U M A R I N

\*\*\*\*\*

\*

99

|      |     |        |          |
|------|-----|--------|----------|
| MASS | 1   | HDR6A  | 1.008    |
| MASS | 2   | HDA2A  | 1.008    |
| MASS | 3   | CD2R6A | 12.011   |
| MASS | 4   | CD2R6H | 12.011   |
| MASS | 5   | CD2O4A | 12.011   |
| MASS | 6   | CD32A  | 12.011   |
| MASS | 7   | CD30A  | 12.011   |
| MASS | 8   | ND3P2A | 14.007   |
| MASS | 9   | OD2C1B | 16.000   |
| MASS | 10  | OD3O6A | 16.000   |
| MASS | 11  | FDA3   | 18.99840 |
| MASS | 199 | DRUD   | 0.0000   |

AUTO DRUDE ANGL DIHE

!-----

RESI COSO 0.000

!-----

GROUP

```

!           H5   H6
!           \   /
!          H4   C11   H7
!           \ / \ /
!          H3- C10   C12-H8
!           |   |
!          01  02  C9   N   H9
!         // \ / \ / \ / \ /
!          C7   C8   C1   C13 -H10
!          |   ||   |   |
!          C6   C4   C2   C14 -H11
!         / \ / \ // \ \ \
!          H2   C5   C3   C15   H12
!           |   |   / \
!          F1-C16-F3 H1 H14 H13
!           |
!           F2

```

!charges: wB97xD/aug-cc-pVTZ CHelpG PCM scaled 0.9

!polarizability: MP2/Sadlej gas phase scaled 0.724

|      |     |        |         |       |        |       |     |
|------|-----|--------|---------|-------|--------|-------|-----|
| ATOM | C1  | CD2R6A | 0.1344  | ALPHA | -1.030 | THOLE | 1.3 |
| ATOM | C2  | CD2R6A | -0.0164 | ALPHA | -1.189 | THOLE | 1.3 |
| ATOM | C3  | CD2R6A | -0.2317 | ALPHA | -1.288 | THOLE | 1.3 |
| ATOM | H1  | HDR6A  | 0.1621  |       |        |       |     |
| ATOM | C4  | CD2R6H | -0.0830 | ALPHA | -1.314 | THOLE | 1.0 |
| ATOM | C5  | CD2R6H | 0.0645  | ALPHA | -1.211 | THOLE | 1.0 |
| ATOM | C6  | CD2R6H | -0.3691 | ALPHA | -1.222 | THOLE | 1.0 |
| ATOM | H2  | HDR6A  | 0.1496  |       |        |       |     |
| ATOM | C7  | CD2O4A | 0.7666  | ALPHA | -1.057 | THOLE | 1.0 |
| ATOM | O1  | OD2C1B | -0.5947 | ALPHA | -0.901 | THOLE | 1.2 |
| ATOM | O2  | OD3O6A | -0.3496 | ALPHA | -0.981 | THOLE | 1.2 |
| ATOM | C8  | CD2R6H | 0.2606  | ALPHA | -1.235 | THOLE | 1.0 |
| ATOM | C9  | CD2R6A | -0.2093 | ALPHA | -1.289 | THOLE | 1.3 |
| ATOM | C10 | CD32A  | 0.1748  | ALPHA | -1.229 | THOLE | 1.3 |
| ATOM | H3  | HDA2A  | -0.0115 |       |        |       |     |
| ATOM | H4  | HDA2A  | -0.0115 |       |        |       |     |
| ATOM | C11 | CD32A  | -0.0151 | ALPHA | -1.360 | THOLE | 1.3 |
| ATOM | H5  | HDA2A  | 0.0097  |       |        |       |     |
| ATOM | H6  | HDA2A  | 0.0097  |       |        |       |     |
| ATOM | C12 | CD32A  | 0.0576  | ALPHA | -1.332 | THOLE | 1.3 |
| ATOM | H7  | HDA2A  | 0.0324  |       |        |       |     |
| ATOM | H8  | HDA2A  | 0.0324  |       |        |       |     |

|      |     |        |         |       |        |       |       |
|------|-----|--------|---------|-------|--------|-------|-------|
| ATOM | N   | ND3P2A | -0.1290 | ALPHA | -0.997 | THOLE | 1.0   |
| ATOM | C13 | CD32A  | -0.0478 | ALPHA | -1.364 | THOLE | 1.3   |
| ATOM | H9  | HDA2A  | 0.0626  |       |        |       |       |
| ATOM | H10 | HDA2A  | 0.0626  |       |        |       |       |
| ATOM | C14 | CD32A  | -0.0031 | ALPHA | -1.339 | THOLE | 1.3   |
| ATOM | H11 | HDA2A  | 0.0216  |       |        |       |       |
| ATOM | H12 | HDA2A  | 0.0216  |       |        |       |       |
| ATOM | C15 | CD32A  | 0.0149  | ALPHA | -1.353 | THOLE | 1.3   |
| ATOM | H13 | HDA2A  | 0.0272  |       |        |       |       |
| ATOM | H14 | HDA2A  | 0.0272  |       |        |       |       |
| ATOM | C16 | CD30A  | 0.5635  | ALPHA | -0.651 | THOLE | 0.9   |
| ATOM | F1  | FDA3   | -0.1946 | ALPHA | -0.428 | THOLE | 0.663 |
| ATOM | F2  | FDA3   | -0.1946 | ALPHA | -0.428 | THOLE | 0.663 |
| ATOM | F3  | FDA3   | -0.1946 | ALPHA | -0.428 | THOLE | 0.663 |

BOND C1 C2  
 BOND C1 C9  
 BOND C1 N  
 BOND C2 C3  
 BOND C2 C15  
 BOND C3 H1  
 BOND C3 C4  
 BOND C4 C5  
 BOND C4 C8  
 BOND C5 C6  
 BOND C5 C16  
 BOND C6 H2  
 BOND C6 C7  
 BOND C7 O1  
 BOND C7 O2  
 BOND O2 C8  
 BOND C8 C9  
 BOND C9 C10  
 BOND C10 H3  
 BOND C10 H4  
 BOND C10 C11  
 BOND C11 H5  
 BOND C11 H6  
 BOND C11 C12  
 BOND C12 H7  
 BOND C12 H8  
 BOND C12 N  
 BOND N C13  
 BOND C13 H9  
 BOND C13 H10  
 BOND C13 C14  
 BOND C14 H11  
 BOND C14 H12  
 BOND C14 C15  
 BOND C15 H13  
 BOND C15 H14  
 BOND C16 F1  
 BOND C16 F2  
 BOND C16 F3  
 IMPR C7 C6 01 02

! ~~~~~  
 RESI COS1 0.000  
 ! ~~~~~

GROUP

```

!           H5      H6
!           \    /
!           C11
!           /    \
!           H4      H7
!           \    /    \
!           H3- C10    C12-H8
!           |      |
!           C9      N      H9
!           / \    / \
!           C7  C8  C1  C13 -H10
!           |   ||   |   |
!           C6  C4   C2  C14 -H11
  
```

```

!      /  \ \ /  \ //  \ /  \
!   H2   C5   C3   C15   H12
!       |   |   |   /  \
!     F1-C16-F3  H1  H14  H13
!       |
!       F2
!charges: wB97xD/aug-cc-pVTZ CHelpG PCM scaled 0.9
!polarizability: MP2/Sadlej gas phase scaled 0.724
ATOM   C1      CD2R6A  0.1348  ALPHA  -1.103  THOLE   1.3
ATOM   C2      CD2R6A  0.042   ALPHA  -1.236  THOLE   1.3
ATOM   C3      CD2R6A -0.3109 ALPHA  -1.398  THOLE   1.3
ATOM   H1      HDR6A   0.1758
ATOM   C4      CD2R6H  0.0974  ALPHA  -1.274  THOLE   1.0
ATOM   C5      CD2R6H -0.0743 ALPHA  -1.368  THOLE   1.0
ATOM   C6      CD2R6H -0.406   ALPHA  -1.258  THOLE   1.0
ATOM   H2      HDR6A   0.1438
ATOM   C7      CD2O4A  0.673   ALPHA  -1.194  THOLE   1.0
ATOM   O1      OD2C1B -0.634   ALPHA  -1.018  THOLE   1.2
ATOM   O2      OD3O6A -0.3415 ALPHA  -1.040  THOLE   1.2
ATOM   C8      CD2R6H  0.2179  ALPHA  -1.457  THOLE   1.0
ATOM   C9      CD2R6A -0.1666 ALPHA  -1.367  THOLE   1.3
ATOM   C10     CD32A   0.1453  ALPHA  -1.263  THOLE   1.3
ATOM   H3      HDA2A   -0.0013
ATOM   H4      HDA2A   -0.0013
ATOM   C11     CD32A   0.0182  ALPHA  -1.356  THOLE   1.3
ATOM   H5      HDA2A   0.0123
ATOM   H6      HDA2A   0.0123
ATOM   C12     CD32A   0.0321  ALPHA  -1.364  THOLE   1.3
ATOM   H7      HDA2A   0.05
ATOM   H8      HDA2A   0.05
ATOM   N       ND3P2A -0.0449 ALPHA  -1.027  THOLE   1.0
ATOM   C13     CD32A  -0.0814 ALPHA  -1.401  THOLE   1.3
ATOM   H9      HDA2A   0.0852
ATOM   H10     HDA2A   0.0852
ATOM   C14     CD32A   0.0206  ALPHA  -1.382  THOLE   1.3
ATOM   H11     HDA2A   0.0279
ATOM   H12     HDA2A   0.0279
ATOM   C15     CD32A  -0.0279 ALPHA  -1.395  THOLE   1.3
ATOM   H13     HDA2A   0.0447
ATOM   H14     HDA2A   0.0447
ATOM   C16     CD30A   0.6138  ALPHA  -0.722  THOLE   0.9
ATOM   F1      FDA3   -0.2216 ALPHA  -0.452  THOLE   0.663
ATOM   F2      FDA3   -0.2216 ALPHA  -0.452  THOLE   0.663
ATOM   F3      FDA3   -0.2216 ALPHA  -0.452  THOLE   0.663

BOND  C1      C2
BOND  C1      C9
BOND  C1      N
BOND  C2      C3
BOND  C2      C15
BOND  C3      H1
BOND  C3      C4
BOND  C4      C5
BOND  C4      C8
BOND  C5      C6
BOND  C5      C16
BOND  C6      H2
BOND  C6      C7
BOND  C7      O1
BOND  C7      O2
BOND  O2      C8
BOND  C8      C9
BOND  C9      C10
BOND  C10     H3
BOND  C10     H4
BOND  C10     C11
BOND  C11     H5
BOND  C11     H6
BOND  C11     C12
BOND  C12     H7
BOND  C12     H8

```

```

BOND C12 N
BOND N C13
BOND C13 H9
BOND C13 H10
BOND C13 C14
BOND C14 H11
BOND C14 H12
BOND C14 C15
BOND C15 H13
BOND C15 H14
BOND C16 F1
BOND C16 F2
BOND C16 F3
IMPR C7 C6 01 02

```

END

READ PARA CARD

```

=====
*. P A R A M E T E R O F COUMARIN
=====
*

```

ATOMS

```

!-----
! ID NAME MASS
!-----
MASS 1 HDR6A 1.008
MASS 2 HDA2A 1.008
MASS 3 CD2R6A 12.011
MASS 4 CD2R6H 12.011
MASS 5 CD2O4A 12.011
MASS 6 CD32A 12.011
MASS 7 CD30A 12.011
MASS 8 ND3P2A 14.007
MASS 9 OD2C1B 16.000
MASS 10 OD3O6A 16.000
MASS 11 FDA3 18.99840
MASS 199 DRUD 0.0000

```

BONDS

```

!
! U_bond = k ( r - r0 )^2
!
!-----
! TYPE1 TYPE2 k [kcal/mol Angstroem^2] r0 [Angstroem]
!-----
OD3O6A CD2R6H 330.00 1.37969
CD2O4A OD3O6A 235.00 1.39145
CD2R6A ND3P2A 330.00 1.38014
CD2R6H CD2R6H 420.00 1.40119
CD2R6H CD30A 198.00 1.50261
CD2R6H CD2O4A 302.00 1.45473
CD2R6H HDR6A 350.00 1.08324
CD2R6A CD2R6A 305.00 1.375
CD2R6A CD32A 230.00 1.490
CD2R6A HDR6A 340.00 1.080
CD2R6A CD2R6H 460.00 1.280
OD2C1B CD2O4A 623.00 1.239
CD32A HDA2A 309.00 1.111
CD32A CD32A 222.50 1.530
ND3P2A CD32A 215.00 1.510
CD30A FDA3 473.00 1.360
X DRUD 500.00 0.000

```

ANGLES

```

!
! U_angle = k ( theta - theta0 )^2
!
!-----

```

| !TYPE1 | TYPE2  | TYPE3  | k [kcal/mol rad <sup>2</sup> ] |         | theta0 [deg] |        |
|--------|--------|--------|--------------------------------|---------|--------------|--------|
| CD2R6A | CD2R6A | CD2R6H | 40.00                          | 119.714 | 35.00        | 2.4162 |
| CD2R6A | CD2R6H | CD2R6H | 40.00                          | 122.053 |              |        |
| OD306A | CD2R6H | CD2R6A | 40.00                          | 115.158 |              |        |
| CD2R6H | CD204A | OD306A | 10.00                          | 116.144 |              |        |
| OD2C1B | CD204A | OD306A | 20.00                          | 118.203 |              |        |
| CD204A | OD306A | CD2R6H | 102.00                         | 122.657 |              |        |
| CD2R6A | CD2R6A | ND3P2A | 40.00                          | 120.098 |              |        |
| CD2R6H | CD2R6H | CD2R6H | 40.00                          | 119.058 |              |        |
| CD2R6H | CD2R6H | CD30A  | 45.80                          | 119.366 |              |        |
| CD2R6H | CD2R6H | HDR6A  | 42.00                          | 122.322 |              |        |
| CD2R6H | CD2R6H | CD204A | 120.00                         | 121.518 |              |        |
| HDR6A  | CD2R6H | CD204A | 30.00                          | 116.158 |              |        |
| CD2R6H | CD204A | OD2C1B | 10.00                          | 125.653 |              |        |
| CD2R6H | CD2R6H | OD306A | 10.00                          | 121.510 |              |        |
| CD2R6H | CD2R6A | CD32A  | 45.80                          | 121.064 |              |        |
| CD2R6A | CD32A  | CD32A  | 51.80                          | 108.773 |              |        |
| HDA2A  | CD32A  | ND3P2A | 32.40                          | 108.809 | 50.00        | 2.1300 |
| CD2R6A | ND3P2A | CD32A  | 55.00                          | 121.662 |              |        |
| CD32A  | ND3P2A | CD32A  | 53.00                          | 114.275 |              |        |
| CD2R6H | CD30A  | FDA3   | 50.00                          | 111.665 | 30.00        | 2.3570 |
| CD2R6A | CD2R6A | CD2R6A | 40.00                          | 120.000 | 35.00        | 2.4162 |
| CD2R6A | CD2R6A | CD32A  | 45.80                          | 122.300 |              |        |
| CD2R6A | CD2R6A | HDR6A  | 30.00                          | 120.000 | 22.00        | 2.1525 |
| CD2R6H | CD2R6A | HDR6A  | 30.00                          | 117.500 |              |        |
| CD2R6A | CD32A  | HDA2A  | 49.30                          | 107.500 |              |        |
| HDA2A  | CD32A  | HDA2A  | 35.50                          | 109.000 | 5.40         | 1.802  |
| CD32A  | CD32A  | HDA2A  | 26.50                          | 110.100 | 22.53        | 2.179  |
| CD32A  | CD32A  | CD32A  | 58.35                          | 113.600 | 11.16        | 2.561  |
| ND3P2A | CD32A  | CD32A  | 67.70                          | 113.000 |              |        |
| FDA3   | CD30A  | FDA3   | 125.00                         | 106.500 |              |        |

#### DIHEDRALS

| !TYPE1 | TYPE2  | TYPE3  | TYPE4  | k [kcal/mol] |   | n      | delta [deg] |
|--------|--------|--------|--------|--------------|---|--------|-------------|
| CD2R6A | CD2R6A | CD2R6A | CD2R6H | 0.5000       | 2 | 180.00 |             |
| CD2R6A | CD2R6A | CD2R6H | CD2R6H | 0.5000       | 2 | 180.00 |             |
| CD2R6A | CD2R6H | CD2R6H | CD2R6A | 2.5000       | 2 | 180.00 |             |
| HDR6A  | CD2R6A | CD2R6H | CD2R6H | 3.1000       | 2 | 180.00 |             |
| CD2R6A | CD2R6A | CD2R6H | OD306A | 3.1000       | 2 | 180.00 |             |
| CD2R6A | CD2R6H | CD2R6H | CD2R6H | 2.0000       | 2 | 180.00 |             |
| CD2R6A | CD2R6H | CD2R6H | OD306A | 3.9000       | 2 | 180.00 |             |
| CD2R6H | CD2R6H | CD2R6H | OD306A | 0.4000       | 2 | 180.00 |             |
| CD2R6H | CD2R6H | CD204A | OD306A | 0.4000       | 2 | 180.00 |             |
| HDR6A  | CD2R6H | CD204A | OD306A | 2.4000       | 2 | 180.00 |             |
| CD204A | OD306A | CD2R6H | CD2R6A | 0.7600       | 2 | 180.00 |             |
| CD2R6H | CD2R6H | OD306A | CD204A | 0.9400       | 2 | 180.00 |             |
| CD2R6H | CD204A | OD306A | CD2R6H | 0.6000       | 2 | 180.00 |             |
| OD2C1B | CD204A | OD306A | CD2R6H | 0.7600       | 2 | 180.00 |             |
| CD2R6A | CD2R6A | CD32A  | CD32A  | 0.2300       | 2 | 180.00 |             |
| CD2R6A | ND3P2A | CD32A  | CD32A  | 2.5000       | 1 | 180.00 |             |
| CD2R6A | ND3P2A | CD32A  | HDA2A  | 0.0000       | 3 | 180.00 |             |
| CD2R6A | CD2R6A | ND3P2A | CD32A  | 1.2000       | 2 | 180.00 |             |
| CD2R6A | CD2R6A | ND3P2A | CD32A  | 0.3000       | 4 | 0.00   |             |
| CD2R6A | CD32A  | CD32A  | CD32A  | 0.0400       | 3 | 0.00   |             |
| CD2R6A | CD32A  | CD32A  | HDA2A  | 0.0400       | 3 | 0.00   |             |
| CD2R6A | CD2R6A | CD2R6A | ND3P2A | 3.1000       | 2 | 180.00 |             |
| CD2R6A | CD2R6H | CD2R6H | CD30A  | 3.1000       | 2 | 180.00 |             |
| CD2R6H | CD2R6A | CD2R6A | CD32A  | 3.1000       | 2 | 180.00 |             |
| CD2R6H | CD2R6H | CD2R6H | HDR6A  | 1.0000       | 2 | 180.00 |             |
| CD2R6H | CD2R6H | CD2R6H | CD204A | 3.0000       | 2 | 180.00 |             |
| CD2R6H | CD2R6H | CD30A  | FDA3   | 0.3000       | 2 | 0.00   |             |
| CD2R6H | CD2R6H | CD2R6A | CD32A  | 3.1000       | 2 | 180.00 |             |
| CD2R6H | CD2R6H | CD204A | OD2C1B | 1.0000       | 2 | 180.00 |             |
| CD2R6H | CD2R6H | CD2R6H | CD2R6H | 6.0000       | 2 | 180.00 |             |

|        |        |        |        |        |   |        |
|--------|--------|--------|--------|--------|---|--------|
| HDR6A  | CD2R6H | CD2R6H | CD30A  | 4.0000 | 2 | 180.00 |
| HDR6A  | CD2R6H | CD204A | OD2C1B | 6.0000 | 2 | 180.00 |
| CD204A | CD2R6H | CD2R6H | CD30A  | 3.1000 | 2 | 180.00 |
| OD306A | CD2R6H | CD2R6A | CD32A  | 2.4000 | 2 | 180.00 |
| CD2R6H | CD2R6H | CD2R6H | CD30A  | 3.1000 | 2 | 180.00 |
| CD2R6H | CD2R6A | CD2R6A | ND3P2A | 3.1000 | 2 | 180.00 |
| CD2R6H | CD2R6A | CD32A  | HDA2A  | 0.0020 | 6 | 0.00   |
| CD2R6H | CD2R6A | CD32A  | CD32A  | 0.2300 | 2 | 180.00 |
| CD32A  | CD2R6A | CD2R6A | ND3P2A | 2.4000 | 2 | 180.00 |
| CD32A  | CD32A  | ND3P2A | CD32A  | 2.5000 | 1 | 180.00 |
| CD32A  | CD32A  | ND3P2A | CD32A  | 1.5000 | 2 | 0.00   |
| CD32A  | CD32A  | ND3P2A | CD32A  | 0.5000 | 3 | 0.00   |
| CD32A  | ND3P2A | CD32A  | HDA2A  | 0.0000 | 3 | 180.00 |
| CD2R6A | CD2R6A | CD2R6A | HDR6A  | 4.200  | 2 | 180.00 |
| CD2R6A | CD2R6A | CD32A  | HDA2A  | 0.000  | 6 | 0.00   |
| CD2R6A | CD2R6A | CD2R6A | CD32A  | 3.100  | 2 | 180.00 |
| CD2R6A | CD2R6A | CD2R6A | CD2R6A | 2.800  | 2 | 180.00 |
| CD32A  | CD2R6A | CD2R6A | HDR6A  | 4.200  | 2 | 180.00 |
| CD32A  | CD32A  | CD32A  | HDA2A  | 0.190  | 3 | 0.00   |
| ND3P2A | CD32A  | CD32A  | CD32A  | 0.200  | 3 | 0.00   |
| HDA2A  | CD32A  | CD32A  | HDA2A  | 0.190  | 3 | 0.00   |
| ND3P2A | CD32A  | CD32A  | HDA2A  | 0.190  | 3 | 0.00   |

IMPROPERS

! n > 0:

! U\_improper = k ( 1 + Cos[n phi - delta] )

!

! n = 0:

! U\_improper = k ( phi - delta )^2

!

```

!-----
!TYPE1      TYPE2      TYPE3      TYPE4      k [kcal/mol]      n      delta [deg]
!-----
CD204A      CD2R6H      OD2C1B      OD306A      51.0000      0      0.00

```

NONBONDED nbxmod 5 atom vatom cdiel vdistance switch vswitch -  
cutnb 16.0 ctofnb 12.0 ctonnb 10.0 eps 1.0 e14fac 1.0 wmin 1.5

```

!-----
!TYPE1      epsilon      rmin/2      epsilon14      rmin14/2
!            [kcal/mol] [Angstroem]      [kcal/mol] [Angstroem]
!-----
HDR6A      0.0      -0.0300      1.0500
HDA2A      0.0      -0.0210      1.3400
CD2R6A      0.0      -0.0690      2.0900
CD2R6H      0.0      -0.1070      1.9700
CD204A      0.0      -0.0960      1.6730
CD32A      0.0      -0.0560      2.1000      0.0 -0.01 1.9
CD30A      0.0      -0.0200      2.2000      0.0 -0.01 1.9
ND3P2A      0.0      -0.3600      1.3800
OD2C1B      0.0      -0.2030      1.7740
OD306A      0.0      -0.0800      1.7400
FDA3      0.0      -0.0800      1.6200
DRUD      0.00      -0.0000      0.0000

```

END

RETURN
